# Supplementary material for: Serum choline in extremely preterm infants declines with increasing parenteral nutrition
Source: PubMed Central journal article supplement (PMC7900091; doi:10.1007/s00394-020-02312-2), 2020-06-25
Supplement: 394_2020_2312_MOESM1_ESM.pdf [file 394_2020_2312_MOESM1_ESM.pdf]

## **Serum choline in extremely preterm infants declines with parenteral nutrition**

Anders K. Nilsson<sup>1</sup>, Anders Pedersen<sup>2</sup>, Daniel Malmodin<sup>2</sup>, Anna-My Lund<sup>3</sup>, Gunnel Hellgren<sup>1,4</sup>,  
Chatarina Löfqvist<sup>1,5</sup>, Ingrid Hansen Pupp<sup>3</sup>, Ann Hellström<sup>1</sup>

1. Section for Ophthalmology, Department of Clinical Neuroscience, Institute of Neuroscience and Physiology, Sahlgrenska Academy, University of Gothenburg, Gothenburg, Sweden
2. Swedish NMR Centre, University of Gothenburg, Gothenburg, Sweden
3. Lund University, Skåne University Hospital, Department of Clinical Sciences Lund, Pediatrics, Lund, Sweden
4. Biomedicine, Sahlgrenska Academy, University of Gothenburg, Gothenburg, Sweden;
5. Institute of Health and Care Sciences, Sahlgrenska Academy, University of Gothenburg, Gothenburg, Sweden

**Address correspondence to:** Anders K. Nilsson, anders.k.nilsson@gu.se

Supplementary data

**Supplemental Table 1.** Spearman’s correlations between serum concentrations of choline, betaine, and methionine stratified by postnatal day.

|         | Postnatal day |            |          |            |           |            |           |            |              |            |              |            |                |            |
|---------|---------------|------------|----------|------------|-----------|------------|-----------|------------|--------------|------------|--------------|------------|----------------|------------|
|         | 1 (n=85)      |            | 7 (n=81) |            | 14 (n=79) |            | 28 (n=72) |            | 33-74 (n=81) |            | 75-99 (n=52) |            | 100-158 (n=54) |            |
|         | Betaine       | Methionine | Betaine  | Methionine | Betaine   | Methionine | Betaine   | Methionine | Betaine      | Methionine | Betaine      | Methionine | Betaine        | Methionine |
| Choline | 0.501         | 0.450      | 0.506    | 0.262      | 0.386     | 0.463      | 0.140     | 0.557      | 0.330        | 0.501      | 0.343        | 0.434      | 0.451          | 0.502      |
|         | p<0.0001      | p<0.0001   | p<0.0001 | p=0.0180   | p=0.0004  | p<0.0001   | p=0.24    | p<0.0001   | p=0.0027     | p<0.0001   | p=0.0129     | p=0.0013   | p=0.0006       | p=0.0001   |
| Betaine |               | 0.455      |          | 0.134      |           | 0.272      |           | 0.288      |              | 0.168      |              | 0.150      |                | 0.264      |
|         |               | p<0.0001   |          | p=0.23     |           | p=0.0154   |           | p=0.0141   |              | p=0.13     |              | p=0.29     |                | p=0.0536   |

Supplementary data

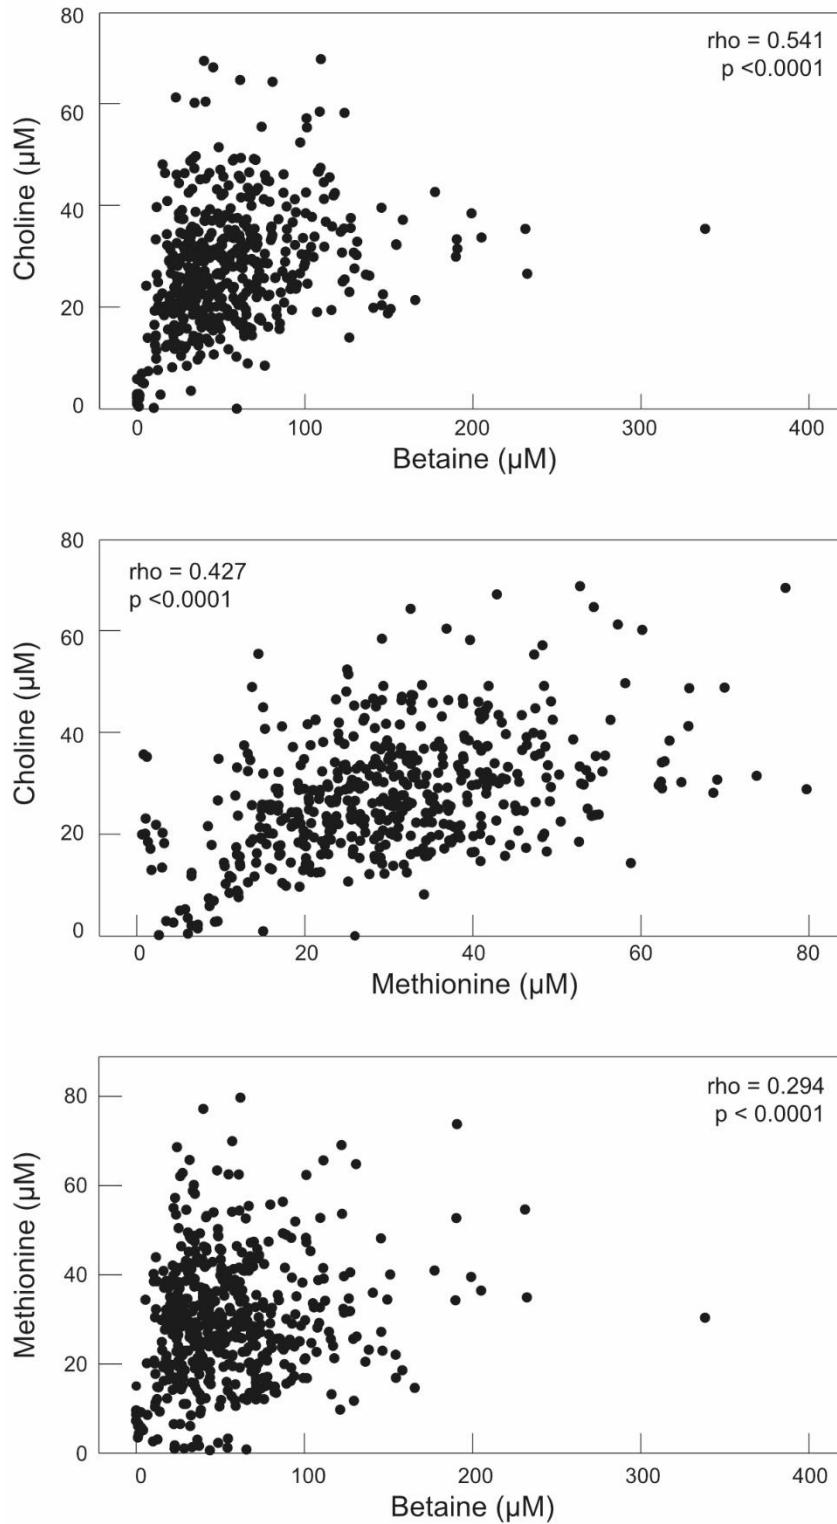

**Supplemental Figure 1.** Associations between serum concentrations of choline, betaine, and methionine. Pearson's correlation coefficient ( $\rho$ ) and p-values from log-transformed data are indicated in the plots. Infant serum samples were collected between postnatal days 1 and 158. n=504.
